# Supplementary material for: Decoration of GO with Fe spinel-Naf/DMAP: an electrochemical probe for sensing H2O2reduction
Source: Royal Society of Chemistry journal article supplement (doi:10.1039/c6ra23409g), 2016-01-01
Supplement: c6ra23409g1.pdf [file c6ra23409g1.pdf]

## Supporting Information

### **Decoration of GO with Fe spinel-Naf/DMAP: an electrochemical sensing probe for H<sub>2</sub>O<sub>2</sub> reduction**

Manorama Singh,<sup>\*a</sup> Smita R. Bhardiya,<sup>a</sup> Hemant Kashyap,<sup>a</sup> Foleswar Verma,<sup>a</sup> Vijai K. Rai<sup>a</sup> and I. Tiwari<sup>b</sup>

Department of Chemistry, School of Physical Sciences, Guru Ghasidas Vishwavidyalaya,

Bilaspur (C.G.)-495009, INDIA

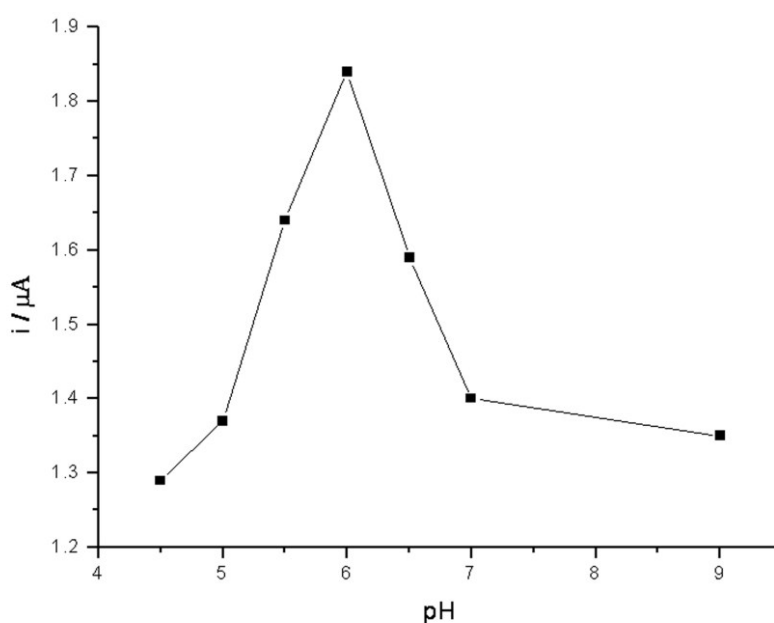

Fig S1: Effect of pH

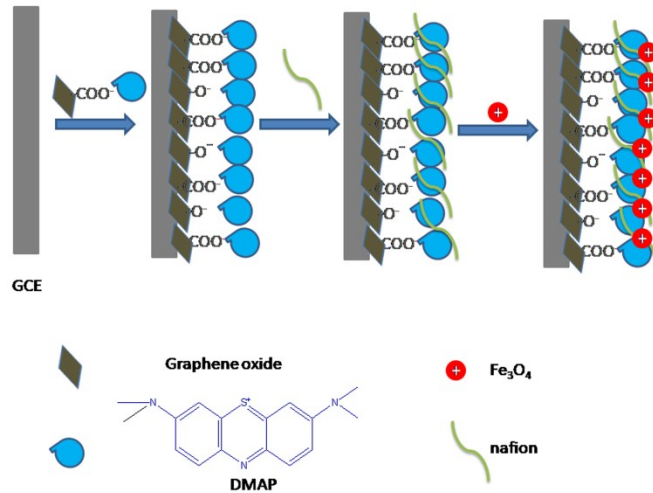

Fig S2: Schematic diagram of stepwise fabrication of  $\text{Fe}_3\text{O}_4$ -Naf/DMAP-GO hybrid film on GC electrode

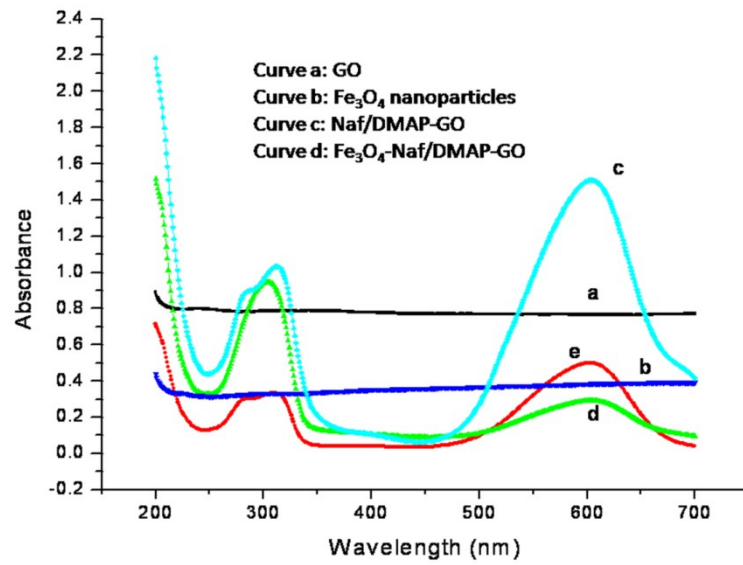

Fig S3 : UV-Visible spectra

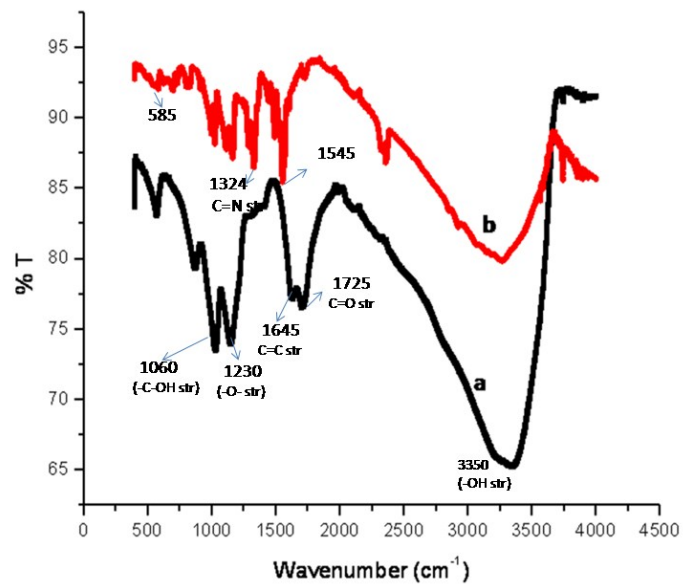

Fig S4: FTIR

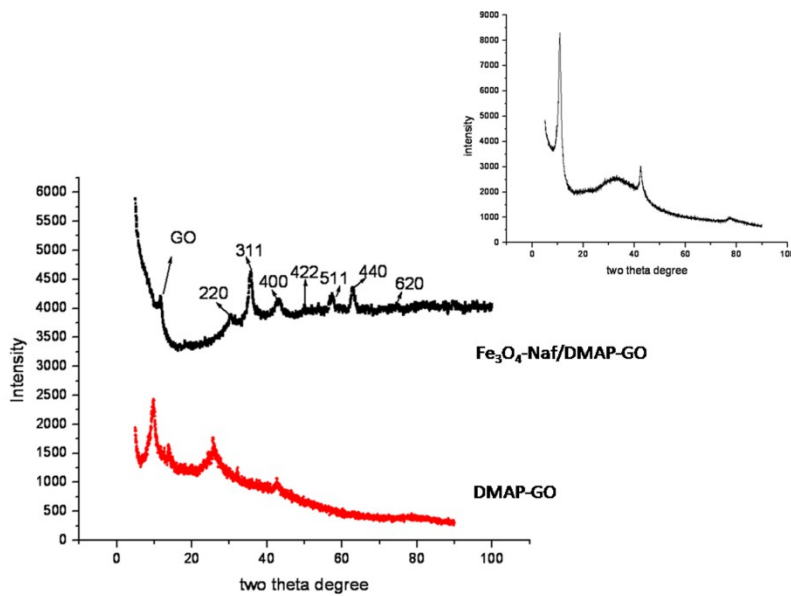

Fig S5 (a) : XRD of DMAP-GO and Fe<sub>3</sub>O<sub>4</sub>-Naf/DMAP-GO

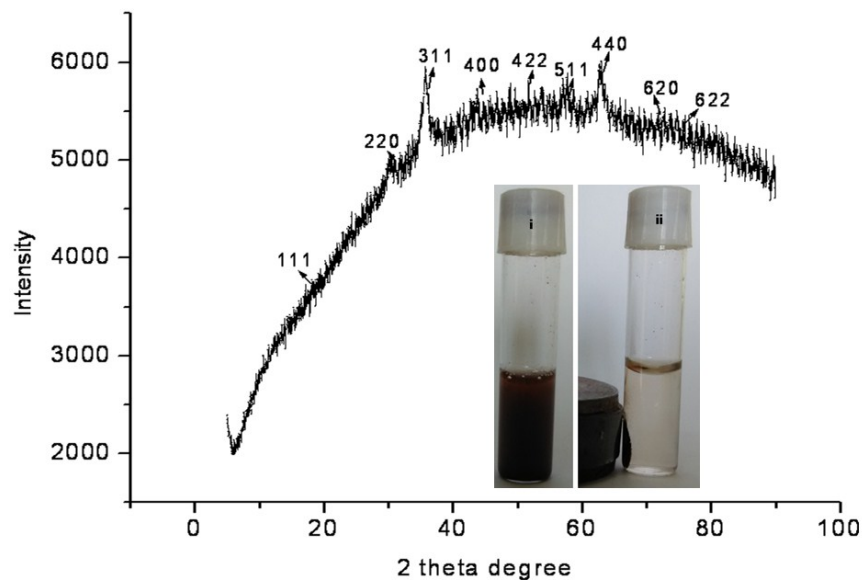

Fig S5: XRD of Fe<sub>3</sub>O<sub>4</sub> (Inset: magnetic behavior of Fe<sub>3</sub>O<sub>4</sub>)

Table S1: Comparative study of different electrode films

| Film modified GCE                              | Cathodic current(at 5 mV/s)          | Anodic current(at 5 mV/s)            | Peak Separation ( $\Delta E$ ) mV | Linear range                               | LOD ( $\mu\text{M}$ ) |
|------------------------------------------------|--------------------------------------|--------------------------------------|-----------------------------------|--------------------------------------------|-----------------------|
| Naf/GO/Fe <sub>3</sub> O <sub>4</sub>          | 0.06 $\mu\text{A}$                   | 0.16 $\mu\text{A}$                   | 0.194                             | 6 $\mu\text{M}$ -200 $\mu\text{M}$         | 8.3                   |
| Naf/DMAP-GO                                    | 0.12 $\mu\text{A}$                   | 0.19 $\mu\text{A}$                   | 0.132                             | 5.5 $\mu\text{M}$ -1 mM                    | 3.4                   |
| Fe <sub>3</sub> O <sub>4</sub> -Naf/DMAP       | 0.14 $\mu\text{A}$                   | 0.23 $\mu\text{A}$                   | 0.201                             | 5.5 $\mu\text{M}$ - 700 $\mu\text{M}$      | 1.6                   |
| <b>Fe<sub>3</sub>O<sub>4</sub>-Naf/DMAP-GO</b> | <b>0.16 <math>\mu\text{A}</math></b> | <b>0.28 <math>\mu\text{A}</math></b> | <b>0.134</b>                      | <b>5.5 <math>\mu\text{M}</math>-2.4 mM</b> | <b>0.6</b>            |
